# Supplementary material for: Evaluation of the TMJ by means of Clinical TMD Examination and MRI Diagnostics in Patients with Rheumatoid Arthritis
Source: Hindawi journal article supplement (doi:10.1155/2014/328560), 2014-01-01
Supplement: f1 [file 328560.f1.pdf]

### MRI TMJ Evaluation

Patient No.: \_\_\_\_\_ Family name: \_\_\_\_\_ Given name: \_\_\_\_\_ Date of birth: \_\_\_\_\_

Referred by: \_\_\_\_\_ MRI examination by: \_\_\_\_\_

Clinical diagnoses: \_\_\_\_\_

MRI diagnoses: \_\_\_\_\_

MR imaging technique and parameters: \_\_\_\_\_

Number of prints: \_\_\_\_\_

Diagnostic remarks: \_\_\_\_\_

#### Condylar morphology\*

| R |                                            | L |
|---|--------------------------------------------|---|
|   | No pathological findings/Convex            |   |
|   | Gable-shaped/Pointed angle                 |   |
|   | Flattening                                 |   |
|   | Concavity                                  |   |
|   | Hypoplasia                                 |   |
|   | Deformation                                |   |
|   | Fracture                                   |   |
|   | <b>Compacta:</b> No pathological findings  |   |
|   | Erosion                                    |   |
|   | Osteophyte formation                       |   |
|   | <b>Spongiosa:</b> No pathological findings |   |
|   | Degeneration                               |   |
|   | Inflammation/Tumor                         |   |

#### Disk morphology\* (closed mouth)

| R |                                 | L |
|---|---------------------------------|---|
|   | No evaluation possible          |   |
|   | Biconcave                       |   |
|   | Biplanar                        |   |
|   | Overall thickening              |   |
|   | Overall or central thinning     |   |
|   | Thickening in the marginal area |   |
|   | Flattening in the marginal area |   |
|   | Deformation                     |   |
|   | Plicated                        |   |
|   | Spherical                       |   |
|   | Perforated                      |   |
|   | Destroyed/Fragmented            |   |

#### Fossa/tubercular morphology

| R |                                             | L |
|---|---------------------------------------------|---|
|   | No pathological findings                    |   |
|   | Erosion                                     |   |
|   | Osteophyte formation                        |   |
|   | <b>Angle of articular eminence:</b> average |   |
|   | pointed                                     |   |
|   | obtuse                                      |   |
|   | <b>Tubercle:</b> No pathological findings   |   |
|   | Pointed configuration                       |   |
|   | Flattening                                  |   |

#### Condyle/fossa relationship (closed mouth)

| R |                                             | L |
|---|---------------------------------------------|---|
|   | Centric                                     |   |
|   | Anterior orientation                        |   |
|   | Posterior orientation                       |   |
|   | Cranial orientation                         |   |
|   | Caudal orientation                          |   |
|   | Localizer image in the sagittal plane       |   |
|   | Localizer image perp. to condylar long axis |   |
|   | Localizer image insufficiently aligned      |   |
|   | Condyle not discernible in localizer image  |   |

\* Multiple answers permitted

#### Condyle/fossa relationship (open mouth)

| R |                                   | L |
|---|-----------------------------------|---|
|   | Translation movement: Regular     |   |
|   | Translation movement: Hypermobile |   |
|   | Translation movement: Reduced     |   |
|   | Translation movement: No          |   |
