# Supplementary material for: Evaluation of the TMJ by means of Clinical TMD Examination and MRI Diagnostics in Patients with Rheumatoid Arthritis
Source: Hindawi journal article supplement (doi:10.1155/2014/328560), 2014-01-01
Supplement: f2 [file 328560.f2.pdf]

**Disk position sagittal (closed mouth)**

| R | L                                           |
|---|---------------------------------------------|
|   | No evaluation possible                      |
|   | Regular                                     |
|   | Partial anterior disk displacement          |
|   | Complete anterior disk displacement         |
|   | Posterior disk displacement                 |
|   |                                             |
|   | Localizer image in the sagittal plane       |
|   | Localizer image perp. to condylar long axis |
|   | Localizer image insufficiently aligned      |
|   | Condyle not discernible in localizer image  |

**Disk position sagittal (open mouth)**

| R | L                                           |
|---|---------------------------------------------|
|   | No evaluation possible                      |
|   | Regular                                     |
|   | Anterior disk displacement                  |
|   | Posterior disk displacement                 |
|   | Disk reduction: Yes                         |
|   | Disk reduction: No                          |
|   | Disk adhesion                               |
|   |                                             |
|   | Localizer image in the sagittal plane       |
|   | Localizer image perp. to condylar long axis |
|   | Localizer image insufficiently aligned      |
|   | Condyle not discernible in localizer image  |

**Disk position coronal (closed mouth)**

| R | L                                              |
|---|------------------------------------------------|
|   | No evaluation possible                         |
|   | Regular                                        |
|   | Lateral displacement                           |
|   | Medial displacement                            |
|   | Anterior displacement                          |
|   |                                                |
|   | Localizer image parallel to condylar long axis |
|   | Localizer image insufficiently aligned         |
|   | Condyle not discernible in localizer image     |

**Disk displacement right**

|         | Anterior | Posterior | Regular |
|---------|----------|-----------|---------|
| Regular |          |           | -----   |
| Lateral |          |           |         |
| Medial  |          |           |         |

**Disk displacement left**

|         | Anterior | Posterior | Regular |
|---------|----------|-----------|---------|
| Regular |          |           | -----   |
| Lateral |          |           |         |
| Medial  |          |           |         |

**Bilaminar zone (sagittal/open mouth)**

| R | L                                   |
|---|-------------------------------------|
|   | No evaluation possible              |
|   | Disco-temporal ligament visible     |
|   | Disco-temporal ligament not visible |
|   | Disco-condylar ligament visible     |
|   | Disco-condylar ligament not visible |

**Signal intensity, TSE T2-weighted (condyle)**

| R | L                             |
|---|-------------------------------|
|   | No increased signal intensity |
|   | Increased signal intensity    |

**Signal intensity, TSE T2-weighted (joint space/bilaminar zone)**

| R | L                             |
|---|-------------------------------|
|   | No increased signal intensity |
|   | Increased signal intensity    |

**MRI with contrast media, joint/soft tissue/bone:**

**Signature:**
